# Supplementary material
Source: Elsevier journal article supplement (https://www.sciencedirect.com/science/article/pii/S2173580820300900)
Supplement: mmc1 [file S2173580820300900:mmc1.docx]

S1 Figura. Abundancia de *Clostridiales*. Datos expresados como BBH directo en % y presentados como media±SEM. *p<0.05; **p<0.01; ***p<0.001; ****p<0.0001. (1) Datos tras eliminar valores atípicos.

S2 Figura. Abundancia de *Selenomonadales*. Datos expresados como BBH directo en % y presentados como media±SEM. *p<0.05.

S3 Figura. Abundancia de *Bacteroidetes*. Datos expresados como BBH directo en % y presentados como media±SEM. *p<0.05; **p<0.01; (1) Datos tras eliminar valores atípicos.

S4 Figura Abundancia de *Proteobacteria* Datos expresados como BBH directo en % y presentados como media±SEM. *p<0.05; **p<0.01

S5 Figura. Abundancia de *Actinobacteria*. Datos expresados como BBH directo en % y presentados como media±SEM. *p<0.05; **p<0.01
